# Supplementary material for: Extremely low nucleotide polymorphism in Pinus krempfii Lecomte, a unique flat needle pine endemic to Vietnam
Source: PubMed Central journal article supplement (PMC4201436; doi:10.1002/ece3.1091), 2014-05-08

## Supporting information

**Table S1** Descriptions of the ten investigated nuclear loci.

**Table S2** Primers used for *mtDNA* and *cpDNA* amplification. Primers that generated polymorphic *cpSSR* sites are in bold.

**Table S3** Prior distribution of the demographic parameters for standard neutral model (N), exponential growth model (G) and bottleneck model (B).

**Table S4** Geographic location, sample sizes ( $N$ ), the number of segregating sites ( $S$ ), nucleotide polymorphism ( $\theta_w$ ) nucleotide diversity ( $\pi_t$ , total sites;  $\pi_s$ , silent sites;  $\pi_a$ , non-synonymous), number of haplotypes ( $n_h$ ) of the investigated populations of *P. krempfii* based on individual nuclear loci.

**Table S5** Neutrality tests for individual nuclear loci as measured by Tajima's  $D$ , Fu and Li's  $D^*$  and  $F^*$ , Fu's  $F_s$ , standardized Fay and Wu's  $H$ , and the MK test.

**Table S6** Population differentiation ( $F_{ST}$ ) for each region and total sample of *P. krempfii* based on individual and combined nuclear loci.

**Table S7** Summary of nucleotide diversity and effective population size in 22 pine species based on nuclear genes. Species with limited range of distribution are in bold.

**Fig. S1** Linkage disequilibrium ( $r^2$ ) as a function of the distance between sites across the ten nuclear genes in *P. krempfii*.

**Fig. S2** Structure analysis of the six sampled populations of *P. krempfii* based on nuclear loci.

(a) The Log probability of data  $L(K)$  (mean and standard deviation over 10 replicates) given the number of genetic clusters  $K$  ranging between 1 and 10. (b) Magnitude of  $\Delta K$  for each  $K = 2-9$ . (c) Assignments of population frequency of demes by Structure at  $K = 2-6$ . For each  $K$  value, results of the run with the highest value of  $L(K)$  were used.

**Fig. S3** Mean and variance of four summary statistics calculated from  $10^5$  posterior predictive simulations. Values of the corresponding summary statistics for the observed **nuclear** data are indicated by vertical red lines.

**Table S1** Descriptions of the ten investigated nuclear loci.

| Locus           | Putative function                                            | PCR primers (5'-3')                                                                                                   | Annealing temperature (°C) | Alignment    |                         |                            |
|-----------------|--------------------------------------------------------------|-----------------------------------------------------------------------------------------------------------------------|----------------------------|--------------|-------------------------|----------------------------|
|                 |                                                              |                                                                                                                       |                            | length* (bp) | Exon                    | Intron                     |
| <i>IFG 8612</i> | Late embryogenesis abundant protein                          | F: GAGTGCAAATAGCTACTCTCAGG<br>R: CAACAATAGGAATGTGCATGGTAAGG<br>IF: CAACTGCCCTGTCAATAGGTC<br>IR: GACCTATTGACAGGGCAGTTG | 52                         | 966          | 811-966                 | 1-810                      |
| <i>CFX</i>      | Cellulose synthase                                           | F: ATCCAAGGGCCAGTGTATGT<br>R: CAAACGACTTCTCAAAGCTTCTCT<br>IF: TATTGAGGAGGATATACCTG<br>IR: GTAAGAGCTTCAACTACAGA        | 52                         | 1102         | 1-203; 1067-1102        | 204-1066                   |
| <i>4CL</i>      | 4-coumarate-CoA ligase                                       | F: CAGAGGTGGAAGTATTTC<br>R: CTGCTTCTGTCATGCCGTA<br>IF: CATCTATTCTCTCAATTCCG<br>IR: TTTGTGATGTCCAGGACAAT               | 52                         | 1089         | 1-808; 1085-1089        | 809-1084                   |
| <i>TPP 1</i>    | Sucrose-phosphatase                                          | F: AAAGAGCTGAGAAAGGAGAAAC<br>R: CCTCATACCACTGCAATAACTC<br>IF: CTATACCTGAATTGGTACAG<br>IR: GTCATGCAAGGAACCTAATC        | 60                         | 1195         | 1-161; 369-470; 784-978 | 162-368; 471-783; 979-1195 |
| <i>IFG 1934</i> | Chloroplast light harvesting chlorophyll a/b binding protein | F: CTAAGTCTGCAACAATGGCAA<br>R: TAGGCCAGGCGTTGTTGTT                                                                    | 52                         | 765          | 1-765                   | -                          |
| <i>SOS 27</i>   | Calcium-dependent protein kinase                             | F: AGAAACGTCTTAAGGCTGCTG<br>R: TGGTTGAAATTGTGATCCCTT                                                                  | 60                         | 1252         | 1-9; 146-261; 337-513   | 10-145; 262-336; 514-1252  |
| <i>Rav 2</i>    | Ethylene-responsive element binding factor                   | F: GTTGCAGGAATTGATTGTGTG<br>R: AATGGCAGAGACCAAGTTCTG                                                                  | 60                         | 752          | 38-661                  | 1-37; 662-752              |
| <i>GSTG 1</i>   | Gamma subunit of elongation factor 1b subfamily              | F: GCAACCAAGGAACAAAAGC<br>R: TCGAATCTAACAAAGGCTCAC                                                                    | 55                         | 815          | 1-204; 471-815          | 205-470                    |
| <i>GSTH 2</i>   | DHAR class glutathione S-transferase                         | F: ATGTCAGACCTCGAAGTTTTTG<br>R: ATTTTATCAGAGTCTTGGATCCAT                                                              | 55                         | 494          | 1-48; 163-242; 441-494  | 49-162; 243-440            |
| <i>TPS 4</i>    | Alpha-trehalose-phosphate synthase                           | F: CATGGGTCAATTAGAATCTGTG<br>R: GATTTACCTTGATAGCACCACCTTA                                                             | 55                         | 520          | 1-520                   |                            |
| Total           |                                                              |                                                                                                                       |                            | 8950         | 4608                    | 4342                       |

\* without outgroup

IF and IR, internal primers for sequencing

**Table S2** Primers used for *mt* DNA and *cp* DNA amplification. Primers that generated polymorphic *cp* SSR sites are in bold.

| Locus                | Primer name           | Sequence (5'-3')                  | Annealing temperature (°C) | Sequence length (bp) | Reference                              |
|----------------------|-----------------------|-----------------------------------|----------------------------|----------------------|----------------------------------------|
| <b>mtDNA</b>         |                       |                                   |                            |                      |                                        |
| 18S <i>rRNA</i>      | <i>rrn</i> 18-F       | GGGGTGC <b>TTTCTTG</b> ACCATTTC   | 57                         | 964                  | This study                             |
|                      | <i>rrn</i> 18-R       | CCCTACGGCTACCTT <b>GT</b> TACGACT |                            |                      |                                        |
| <i>matR</i>          | <i>matR</i> -F        | GACCGACATCGACTCATCTCAA            | 57                         | 1128                 | This study                             |
|                      | <i>matR</i> -R        | CATAATACGCC <b>CCACG</b> CTCACT   |                            |                      |                                        |
| <i>nad3-rps 12</i>   | <i>nad3/rps 12</i> -F | GTTCGCTAGTTT <b>GT</b> TTGATCCC   | 54                         | 673                  | (Soranzo <i>et al.</i> , 1999)         |
|                      | <i>nad3/rps 12</i> -R | TCCCAGCAAAT <b>CC</b> TTGACTC     |                            |                      |                                        |
| <i>nad1</i> intron 2 | <i>nad1</i> -2F       | CGCCCGTTT <b>CC</b> ATTTCGTG      | 57                         | 1510                 | This study                             |
|                      | <i>nad1</i> -2R       | GTGGCTCGTCC <b>GT</b> GCTTTG      |                            |                      |                                        |
| <i>nad5</i> intron 4 | <i>nad5</i> -4F       | GGGGAGGTTTACAGGAGAT               | 54                         | 574                  | This study                             |
|                      | <i>nad5</i> -4R       | AGTAGTGCCAGCAGGAATG               |                            |                      |                                        |
| <i>cox 1</i>         | <i>cox1</i> -F        | TGGGAATCATCAACCTCA                | 55                         | 1170                 | This study                             |
|                      | <i>cox1</i> -R        | GACCACGAAGAAACGAAA                |                            |                      |                                        |
| <i>mh 09</i>         | <i>mh09</i> -F        | TCATCCATCCTCCAGCAACA              | 55                         | 189                  | (Jeandroz <i>et al.</i> , 2002)        |
|                      | <i>mh09</i> -R        | TCATCCCCAGAAAGAGACAG              |                            |                      |                                        |
| <i>mh 05</i>         | <i>mh05</i> -F        | GGGAGTCAGCGAAAGAAGTAA             | 52                         | Failed amplification | (Jeandroz <i>et al.</i> , 2002)        |
|                      | <i>mh05</i> -R        | AGTCTCAGAGCCAGAAGCAG              |                            |                      |                                        |
| <i>mh 09'</i>        | <i>mh09'</i> -F       | CCATCCAGCCATGTCTCATC              | 52                         | Failed amplification | (Jeandroz <i>et al.</i> , 2002)        |
|                      | <i>mh09'</i> -R       | AGGGCTTACATAGAGCATC               |                            |                      |                                        |
| <i>mh 33</i>         | <i>mh33</i> -F        | TTCCCCAGACAGAACAGATAG             | 52                         | Failed amplification | (Jeandroz <i>et al.</i> , 2002)        |
|                      | <i>mh33</i> -R        | GCTCTTAAGTGCTGGTTGATG             |                            |                      |                                        |
| <i>mh 35</i>         | <i>mh35</i> -F        | CGATGACATCTCTTAGCTTCC             | 52                         | Failed amplification | (Jeandroz <i>et al.</i> , 2002)        |
|                      | <i>mh35</i> -R        | TGGGGAATAGGATTCGGGTAA             |                            |                      |                                        |
| <i>nad5</i> intron 1 | <i>nad5</i> -1F       | GGAAATGTTTGATGCTTCTTGGG           | 55                         | 1227                 | (Wang <i>et al.</i> , 2000)            |
|                      | <i>nad5</i> -1R       | CTGATCCAAAATCACCTACTCG            |                            |                      |                                        |
| <i>nad4</i> intron 3 | <i>nad4</i> -3F       | GGAGCTTCCAAAGAAATAG               | 55                         | 1939                 | (Dumolin-Lapegue <i>et al.</i> , 1997) |
|                      | <i>nad4</i> -3R       | GCCATGTTGCACTAAGTTAC              |                            |                      |                                        |
| <i>nad7</i> intron 1 | <i>nad7</i> -1F       | GGAACCGCATATTGGATCAC              | 55                         | 1400                 | (Tian <i>et al.</i> , 2010)            |
|                      | <i>nad7</i> -1R       | GTTGTACCGTAAACCTGCTC              |                            |                      |                                        |
| Total mtDNA          |                       |                                   |                            | 10774                |                                        |

**Table S2 continued**

| Locus                       | Primer name | Sequence (5'-3')         | Annealing temperature (°C) | Sequence Length (bp) | Reference                        |
|-----------------------------|-------------|--------------------------|----------------------------|----------------------|----------------------------------|
| cpDNA                       |             |                          |                            |                      |                                  |
| <b>Scored by genotyping</b> |             |                          |                            |                      |                                  |
| <b>Pt45002</b>              | PT45002-F   | AAGTTGGATTTTACCCAGGTG    | 52                         | ca. 184              | (Vendramin <i>et al.</i> , 1996) |
|                             | PT45002-R2  | AACCCCAAGAACAAGAGGAT     |                            |                      |                                  |
| <b>Pt71936</b>              | PT71936-F   | TTCATTGGAAATACACTAGCCC   | 52                         | ca. 139              | (Vendramin <i>et al.</i> , 1996) |
|                             | PT71936-R   | AAAACCGTACATGAGATTCCC    |                            |                      |                                  |
| Pt87268                     | PT87268-F   | GCCAGGGAAAATCGTAGG       | 52                         | ca. 147              | (Vendramin <i>et al.</i> , 1996) |
|                             | PT87268-R   | AGACGATTAGACATCCAACCC    |                            |                      |                                  |
| <b>Pt30204</b>              | PT30204-F   | TCATAGCGGAAGATCCTCTTT    | 52                         | ca. 152              | (Vendramin <i>et al.</i> , 1996) |
|                             | PT30204-R   | CGGATTGATCCTAACCATAACC   |                            |                      |                                  |
| PCP1289                     | PCP1289-F   | TCCTGGTTCCAGAAATGGAG     | 52                         | Failed amplification | (Provan <i>et al.</i> , 1998)    |
|                             | PCP1289-R   | TAATTTGGTTCCAGAATTGCG    |                            |                      |                                  |
| PCP41131                    | PCP41131-F  | AAAGCATTTCCAGTTGGGG      | 52                         | 113                  | (Provan <i>et al.</i> , 1998)    |
|                             | PCP41131-R  | GGTCAGGATTCATGTTCTTCC    |                            |                      |                                  |
| <b>Scored by sequencing</b> |             |                          |                            |                      |                                  |
| Pt15169                     | PTS15169-F  | CCCCTTGTAAGATGAAC        | 50                         | 637                  | This study                       |
|                             | PTS15169-R  | AATGGCTTGGTGGTATGT       |                            |                      |                                  |
| <b>Pt63718</b>              | PTS63718-F  | GATCTGGATATTTCCCTCCGATAC | 50                         | ca. 806              | This study                       |
|                             | PTS63718-R  | AAGCGTTGGTTGGGTAAGC      |                            |                      |                                  |
| <b>Pt100783</b>             | PTS100783-F | AAAACAATAGCGTCTCC        | 50                         | ca. 1017             | This study                       |
|                             | PTS100783-R | CCGAATATGGTCCAATCA       |                            |                      |                                  |
| Pt26081                     | PTS26081-F  | ATTCAGGGATTGTAAACG       | 50                         | 780                  | This study                       |
|                             | PTS26081-R  | CGAGATGATAAGGGAACTA      |                            |                      |                                  |
| Pt36480                     | PTS36480-F  | TGAAAGGGAGTAAGATAAATGG   | 50                         | 833                  | This study                       |
|                             | PTS36480-R  | GAGATAGATCGCAGGGAGG      |                            |                      |                                  |
| <b>PKS108222A*</b>          | PKS108222-F | ACCCTGAGATCGTTTGA        | 50                         | ca. 664              | This study                       |
|                             | PKS108222-R | TCCATTGCTATGCGTTT        |                            |                      |                                  |
| <b>PKS108222T*</b>          | PKS108222-F | ACCCTGAGATCGTTTGA        | 50                         | ca. 664              | This study                       |
|                             | PKS108222-R | TCCATTGCTATGCGTTT        |                            |                      |                                  |

\*PKS108222A and PKS108222T are amplified by same primers

**References:** Dumolin-Lapegue, S., Pemonge, M.H. & Petit, R.J. 1997. An enlarged set of consensus primers for the study of organelle DNA in plants. *Mol. Ecol.* **6**: 393-397.

Jeandroz, S., Bastien, D., Chandelier, A., Du Jardin, P. & Favre, J.M. 2002. A set of primers for amplification of mitochondrial DNA in *Picea abies* and other conifer species. *Mol. Ecol. Notes* **2**: 389-392.

Provan, J., et al. 1998. Gene-pool variation in Caledonian and European Scots pine (*Pinus sylvestris* L.) revealed by chloroplast simple-sequence repeats. *Proc. Roy. Soc. Lond. B. Biol. Sci.* **265**: 1697-1705.

Soranzo, N., Provan, J. & Powell, W. 1999. An example of microsatellite length variation in the mitochondrial genome of conifers. *Genome* **42**: 158-161.

Tian, S., Lopez-Pujol, J., Wang, H.W., Ge, S. & Zhang, Z.Y. 2010. Molecular evidence for glacial expansion and interglacial retreat during Quaternary climatic changes in a montane temperate pine (*Pinus kwangtungensis* Chun ex Tsiang) in southern China. *Plant Syst. Evol.* **284**: 219-229.

Wang, X.Q., Tank, D.C. & Sang, T. 2000. Phylogeny and divergence times in Pinaceae: Evidence from three genomes. *Mol. Biol. Evol.* **17**: 773-781.

Vendramin, G.G., Lelli, L., Rossi, P. & Morgante, M. 1996. A set of primers for the amplification of 20 chloroplast microsatellites in Pinaceae. *Mol. Ecol.* **5**: 595-598.

**Table S3** Prior distribution of the demographic parameters for standard neutral model (N), exponential growth model (G) and bottleneck model (B).

| Model | $\theta$         | $\rho$          | $N_I$         | $T_0$         | $T_d$                 |
|-------|------------------|-----------------|---------------|---------------|-----------------------|
| N     | $10^{-5}$ - 0.05 | $10^{-5}$ - 0.1 | na            | na            | na                    |
| G     | $10^{-5}$ - 0.05 | $10^{-5}$ - 0.1 | $10^{-3}$ - 1 | $10^{-5}$ - 1 | na                    |
| B     | $10^{-5}$ - 0.05 | $10^{-5}$ - 0.1 | $10^{-3}$ - 1 | $10^{-5}$ - 1 | $10^{-4}$ - $10^{-1}$ |

$\theta$ , *per site* nucleotide polymorphism;  $\rho$ , *per site* recombination rate;  $N_I$ , ancestral population size in exponential growth model or population size during bottleneck in bottleneck model;  $T_0$ , the time of the initial size change in growth model or the time since the end of bottleneck in bottleneck model;  $T_d$ , duration of bottleneck.  $N_I$  are measured in units of current population size ( $N_0$ );  $T_0$  and  $T_d$  are measured in units of  $4N_0$  generation.

$\theta$ ,  $\rho$ ,  $N_A$ ,  $N_I$ ,  $T_0$  and  $T_d$  are given by an uniform with minimum and maximum, e.g. for all simulations, the distribution of  $\theta$  is an uniform range from  $10^{-5}$  to 0.05. na, no parameter in such model.

**Table S4** Geographic location, sample sizes ( $N$ ), the number of segregating sites ( $S$ ), nucleotide polymorphism ( $\theta_w$ , total sites;  $\theta_{ws}$ , silent sites), nucleotide diversity ( $\pi_t$ , total sites;  $\pi_s$ , silent sites;  $\pi_a$ , non-synonymous), number of haplotypes ( $n_h$ ) of the investigated populations of *P. krempfii* based on individual nuclear loci.

| Population      | Longitude (°E) | Latitude (°N) | $N$ | 4CL |       |            |               |         |         |         | CFX |       |            |               |         |         |         |
|-----------------|----------------|---------------|-----|-----|-------|------------|---------------|---------|---------|---------|-----|-------|------------|---------------|---------|---------|---------|
|                 |                |               |     | $S$ | $n_h$ | $\theta_w$ | $\theta_{ws}$ | $\pi_t$ | $\pi_s$ | $\pi_a$ | $S$ | $n_h$ | $\theta_w$ | $\theta_{ws}$ | $\pi_t$ | $\pi_s$ | $\pi_a$ |
| 1 Da Chay 89A   | 108.6843       | 12.1758       | 9   | 0   | 1     | 0          | 0             | 0       | 0       | 0       | 9   | 6     | 0.0024     | 0.0029        | 0.0030  | 0.0036  | 0       |
| 2 Da Chay 90A   | 108.7015       | 12.1756       | 13  | 5   | 4     | 0.0012     | 0.0022        | 0.0005  | 0.0009  | 0.0001  | 13  | 11    | 0.0031     | 0.0037        | 0.0037  | 0.0045  | 0       |
| 3 Da Chay 91B   | 108.6893       | 12.1938       | 12  | 4   | 5     | 0.0010     | 0.0017        | 0.0005  | 0.0009  | 0.0001  | 9   | 7     | 0.0022     | 0.0026        | 0.0025  | 0.0030  | 0       |
| Total Da Chay   |                |               | 34  | 6   | 6     | 0.0012     | 0.0017        | 0.0003  | 0.0007  | 0.0001  | 13  | 14    | 0.0025     | 0.0030        | 0.0033  | 0.0039  | 0       |
| 4 Cong Troi 102 | 108.4095       | 12.091        | 3   | 0   | 1     | 0          | 0             | 0       | 0       | 0       | 3   | 3     | 0.0012     | 0.0014        | 0.0014  | 0.0017  | 0       |
| 5 Cong Troi 103 | 108.4667       | 11.9488       | 10  | 1   | 2     | 0.0003     | 0             | 0.0002  | 0       | 0.0003  | 11  | 12    | 0.0028     | 0.0034        | 0.0025  | 0.0030  | 0       |
| Total Cong Troi |                |               | 13  | 1   | 2     | 0.0002     | 0             | 0.0001  | 0       | 0.0002  | 12  | 14    | 0.0029     | 0.0034        | 0.0024  | 0.0029  | 0       |
| 6 Bidoup        | 108.6854       | 12.0475       | 10  | 2   | 3     | 0.0005     | 0.0012        | 0.0004  | 0.0009  | 0       | 10  | 9     | 0.0026     | 0.0031        | 0.0038  | 0.0045  | 0       |
| Total           |                |               | 57  | 7   | 7     | 0.0012     | 0.0016        | 0.0003  | 0.0006  | 0.0001  | 16  | 23    | 0.0027     | 0.0033        | 0.0033  | 0.0039  | 0       |

**Table S4** continued

| Population      | Longitude (°E) | Latitude (°N) | $N$ | GSTG 1 |       |            |               |         |         |         | GSTH 2 |       |            |               |         |         |         |
|-----------------|----------------|---------------|-----|--------|-------|------------|---------------|---------|---------|---------|--------|-------|------------|---------------|---------|---------|---------|
|                 |                |               |     | $S$    | $n_h$ | $\theta_w$ | $\theta_{ws}$ | $\pi_t$ | $\pi_s$ | $\pi_a$ | $S$    | $n_h$ | $\theta_w$ | $\theta_{ws}$ | $\pi_t$ | $\pi_s$ | $\pi_a$ |
| 1 Da Chay 89A   | 108.6843       | 12.1758       | 9   | 3      | 3     | 0.0011     | 0.0015        | 0.0004  | 0.0006  | 0.0003  | 6      | 6     | 0.0035     | 0.0033        | 0.0051  | 0.0050  | 0.0056  |
| 2 Da Chay 90A   | 108.7015       | 12.1756       | 13  | 3      | 3     | 0.0010     | 0.0014        | 0.0009  | 0.0007  | 0.0010  | 7      | 7     | 0.0037     | 0.0037        | 0.0031  | 0.0028  | 0.0042  |
| 3 Da Chay 91B   | 108.6893       | 12.1938       | 12  | 3      | 4     | 0.0010     | 0.0028        | 0.0007  | 0.0019  | 0.0010  | 8      | 10    | 0.0043     | 0.0045        | 0.0044  | 0.0045  | 0.0044  |
| Total Da Chay   |                |               | 34  | 7      | 7     | 0.0018     | 0.0033        | 0.0007  | 0.0010  | 0.0005  | 8      | 10    | 0.0034     | 0.0035        | 0.0043  | 0.0041  | 0.0047  |
| 4 Cong Troi 102 | 108.4095       | 12.091        | 3   | 0      | 1     | 0          | 0             | 0       | 0       | 0       | 4      | 5     | 0.0035     | 0.0037        | 0.0036  | 0.0035  | 0.0039  |
| 5 Cong Troi 103 | 108.4667       | 11.9488       | 10  | 3      | 3     | 0.0010     | 0.0015        | 0.0012  | 0.0015  | 0.0009  | 7      | 7     | 0.0040     | 0.0048        | 0.0059  | 0.0074  | 0.0019  |
| Total Cong Troi |                |               | 13  | 3      | 4     | 0.0010     | 0.0014        | 0.0012  | 0.0012  | 0.0010  | 7      | 7     | 0.0037     | 0.0044        | 0.0054  | 0.0067  | 0.0024  |
| 6 Bidoup        | 108.6854       | 12.0475       | 10  | 3      | 4     | 0.0010     | 0.0015        | 0.0005  | 0.0008  | 0.0002  | 6      | 9     | 0.0034     | 0.0040        | 0.0041  | 0.0043  | 0.0037  |
| Total           |                |               | 57  | 8      | 10    | 0.0019     | 0.0035        | 0.0008  | 0.0011  | 0.0006  | 8      | 15    | 0.0030     | 0.0032        | 0.0046  | 0.0048  | 0.0040  |

**Table S4** continued

| Population      | Longitude (°E) | Latitude (°N) | $N$ | IFG 1934 |       |            |               |         |         |         | IFG 8612 |       |            |               |         |         |         |
|-----------------|----------------|---------------|-----|----------|-------|------------|---------------|---------|---------|---------|----------|-------|------------|---------------|---------|---------|---------|
|                 |                |               |     | $S$      | $n_h$ | $\theta_w$ | $\theta_{ws}$ | $\pi_t$ | $\pi_s$ | $\pi_a$ | $S$      | $n_h$ | $\theta_w$ | $\theta_{ws}$ | $\pi_t$ | $\pi_s$ | $\pi_a$ |
| 1 Da Chay 89A   | 108.6843       | 12.1758       | 9   | 2        | 3     | 0.0008     | 0.0031        | 0.0008  | 0.0033  | 0       | 4        | 5     | 0.0012     | 0.0014        | 0.0011  | 0.0013  | 0       |
| 2 Da Chay 90A   | 108.7015       | 12.1756       | 13  | 2        | 3     | 0.0007     | 0.0028        | 0.0008  | 0.0031  | 0       | 4        | 5     | 0.0011     | 0.0013        | 0.0012  | 0.0013  | 0       |
| 3 Da Chay 91B   | 108.6893       | 12.1938       | 12  | 2        | 4     | 0.0007     | 0.0028        | 0.0005  | 0.0020  | 0       | 4        | 5     | 0.0011     | 0.0013        | 0.0010  | 0.0011  | 0       |
| Total Da Chay   |                |               | 34  | 2        | 4     | 0.0006     | 0.0022        | 0.0007  | 0.0028  | 0       | 8        | 9     | 0.0018     | 0.0020        | 0.0010  | 0.0013  | 0       |
| 4 Cong Troi 102 | 108.4095       | 12.091        | 3   | 1        | 2     | 0.0006     | 0.0023        | 0.0004  | 0.0018  | 0       | 1        | 2     | 0.0004     | 0.0005        | 0.0003  | 0.0004  | 0       |
| 5 Cong Troi 103 | 108.4667       | 11.9488       | 10  | 4        | 5     | 0.0015     | 0.0045        | 0.0009  | 0.0025  | 0.0003  | 4        | 4     | 0.0012     | 0.0010        | 0.0013  | 0.0013  | 0.0008  |
| Total Cong Troi |                |               | 13  | 4        | 5     | 0.0014     | 0.0042        | 0.0008  | 0.0023  | 0.0003  | 4        | 4     | 0.0011     | 0.0010        | 0.0012  | 0.0012  | 0.0007  |
| 6 Bidoup        | 108.6854       | 12.0475       | 10  | 2        | 4     | 0.0007     | 0.0030        | 0.0009  | 0.0035  | 0       | 7        | 8     | 0.0021     | 0.0024        | 0.0015  | 0.0018  | 0       |
| Total           |                |               | 57  | 4        | 6     | 0.0010     | 0.0030        | 0.0007  | 0.0028  | 0.0001  | 11       | 11    | 0.0022     | 0.0023        | 0.0012  | 0.0013  | 0.0001  |

**Table S4** continued

| Population      | Longitude (°E) | Latitude (°N) | N  | Rav 2 |       |            |               |         |         |         | SOS 27 |       |            |               |         |         |         |
|-----------------|----------------|---------------|----|-------|-------|------------|---------------|---------|---------|---------|--------|-------|------------|---------------|---------|---------|---------|
|                 |                |               |    | S     | $n_h$ | $\theta_w$ | $\theta_{ws}$ | $\pi_t$ | $\pi_s$ | $\pi_a$ | S      | $n_h$ | $\theta_w$ | $\theta_{ws}$ | $\pi_t$ | $\pi_s$ | $\pi_a$ |
| 1 Da Chay 89A   | 108.6843       | 12.1758       | 9  | 1     | 2     | 0.0004     | 0             | 0.0006  | 0       | 0.0010  | 1      | 3     | 0.0002     | 0.0001        | 0.0002  | 0.0002  | 0       |
| 2 Da Chay 90A   | 108.7015       | 12.1756       | 13 | 1     | 2     | 0.0003     | 0             | 0.0004  | 0       | 0.0007  | 0      | 1     | 0          | 0             | 0       | 0       | 0       |
| 3 Da Chay 91B   | 108.6893       | 12.1938       | 12 | 1     | 2     | 0.0004     | 0             | 0.0005  | 0       | 0.0007  | 2      | 3     | 0.0004     | 0.0001        | 0.0001  | 0.0002  | 0       |
| Total Da Chay   |                |               | 34 | 1     | 2     | 0.0003     | 0             | 0.0005  | 0       | 0.0008  | 3      | 5     | 0.0005     | 0.0001        | 0.0001  | 0.0001  | 0       |
| 4 Cong Troi 102 | 108.4095       | 12.091        | 3  | 1     | 2     | 0.0006     | 0.0016        | 0.0004  | 0.0012  | 0       | 3      | 3     | 0.0011     | 0.0013        | 0.0013  | 0.0016  | 0       |
| 5 Cong Troi 103 | 108.4667       | 11.9488       | 10 | 1     | 2     | 0.0004     | 0             | 0.0007  | 0       | 0.0011  | 0      | 1     | 0          | 0             | 0       | 0       | 0       |
| Total Cong Troi |                |               | 13 | 2     | 3     | 0.0007     | 0.0009        | 0.0007  | 0.0003  | 0.0010  | 3      | 3     | 0.0006     | 0.0008        | 0.0004  | 0.0004  | 0       |
| 6 Bidoup        | 108.6854       | 12.0475       | 10 | 3     | 4     | 0.0011     | 0.0010        | 0.0008  | 0.0004  | 0.0011  | 0      | 1     | 0          | 0             | 0       | 0       | 0       |
| Total           |                |               | 57 | 3     | 4     | 0.0007     | 0.0007        | 0.0006  | 0.0001  | 0.0009  | 5      | 6     | 0.0008     | 0.0011        | 0.0001  | 0.0002  | 0       |

**Table S4** continued

| Population      | Longitude (°E) | Latitude (°N) | N  | TPP 1 |       |            |               |         |         |         | TPS 4 |       |            |               |         |         |         |
|-----------------|----------------|---------------|----|-------|-------|------------|---------------|---------|---------|---------|-------|-------|------------|---------------|---------|---------|---------|
|                 |                |               |    | S     | $n_h$ | $\theta_w$ | $\theta_{ws}$ | $\pi_t$ | $\pi_s$ | $\pi_a$ | S     | $n_h$ | $\theta_w$ | $\theta_{ws}$ | $\pi_t$ | $\pi_s$ | $\pi_a$ |
| 1 Da Chay 89A   | 108.6843       | 12.1758       | 9  | 0     | 1     | 0          | 0             | 0       | 0       | 0       | 1     | 2     | 0.0006     | 0             | 0.0004  | 0       | 0.0005  |
| 2 Da Chay 90A   | 108.7015       | 12.1756       | 13 | 1     | 2     | 0.0002     | 0             | 0.0001  | 0       | 0.0002  | 2     | 3     | 0.0010     | 0.0022        | 0.0004  | 0.0006  | 0.0004  |
| 3 Da Chay 91B   | 108.6893       | 12.1938       | 12 | 1     | 2     | 0.0002     | 0             | 0.0001  | 0       | 0.0002  | 3     | 4     | 0.0015     | 0.0044        | 0.0017  | 0.0031  | 0.0006  |
| Total Da Chay   |                |               | 34 | 1     | 2     | 0.0002     | 0             | 0.0001  | 0       | 0.0002  | 3     | 4     | 0.0012     | 0.0034        | 0.0007  | 0.0014  | 0.0005  |
| 4 Cong Troi 102 | 108.4095       | 12.091        | 3  | 0     | 1     | 0          | 0             | 0       | 0       | 0       | 2     | 3     | 0.0017     | 0.0036        | 0.0013  | 0.0027  | 0.0008  |
| 5 Cong Troi 103 | 108.4667       | 11.9488       | 10 | 0     | 1     | 0          | 0             | 0       | 0       | 0       | 1     | 2     | 0.0005     | 0             | 0.0005  | 0       | 0.0002  |
| Total Cong Troi |                |               | 13 | 0     | 1     | 0          | 0             | 0       | 0       | 0       | 2     | 3     | 0.0010     | 0.0022        | 0.0007  | 0.0006  | 0.0007  |
| 6 Bidoup        | 108.6854       | 12.0475       | 10 | 1     | 2     | 0.0002     | 0.0003        | 0.0001  | 0.0001  | 0       | 1     | 2     | 0.0005     | 0             | 0.0002  | 0       | 0.0002  |
| Total           |                |               | 57 | 2     | 3     | 0.0003     | 0.0002        | 0.0001  | 0       | 0.0001  | 3     | 4     | 0.0011     | 0.0031        | 0.0006  | 0.0010  | 0.0005  |



**TableS5** Neutrality tests for individual nuclear loci as measured by Tajima's  $D$ , Fu and Li's  $D^*$  and  $F^*$ , Fu's  $F_s$ , standardized Fay and Wu's  $H$ , and the MK test.

| Populations     | 4CL          |         |         |         |         |         |          | CFX          |         |         |         |         |         |          |
|-----------------|--------------|---------|---------|---------|---------|---------|----------|--------------|---------|---------|---------|---------|---------|----------|
|                 | Tajima's $D$ | $D^*$   | $F^*$   | $F_s$   | $H$     | MK test |          | Tajima's $D$ | $D^*$   | $F^*$   | $F_s$   | $H$     | MK test |          |
|                 |              |         |         |         |         | Fisher  | $G$ test |              |         |         |         |         | Fisher  | $G$ test |
| 1 Da Chay 90A   | -1.7092      | -2.2413 | -2.4209 | -1.2400 | 0.4298  | 0.5846  | 0.7960   | 0.7132       | -0.1923 | 0.0974  | -1.4480 | 0.5445  | na      | na       |
| 2 Da Chay 91B   | -1.4953      | -0.8560 | -1.1998 | -2.8420 | -1.5134 | 1.0000  | 0.1440   | 0.4573       | 1.3732* | 1.2829  | 0.1310  | -0.8995 | na      | na       |
| 3 Da Chay 89A   | na           | na      | na      | na      | na      | na      | na       | 0.9175       | 1.3827* | 1.4451  | 0.9520  | -0.9901 | na      | na       |
| 4 Cong Troi 102 | na           | na      | na      | na      | na      | na      | na       | 1.1241       | 1.3958  | 1.4062  | 0.6150  | -0.8514 | na      | na       |
| 5 Cong Troi 103 | -0.5916      | 0.6495  | 0.3673  | -0.0970 | 0.3992  | 1.0000  | 0        | -0.3438      | 0.1161  | -0.0191 | -5.6180 | -0.4155 | na      | na       |
| 6 Bidoup        | -0.5278      | -0.5935 | -0.6606 | -0.4640 | 0.5485  | 0.4965  | na       | 1.6614       | 1.4100* | 1.7172* | -0.6530 | 0.6158  | na      | na       |
| Total           | -1.7067      | -1.4859 | -1.8489 | -5.3330 | -1.4131 | 1.0000  | 0.1420   | 0.5462       | 0.0215  | 0.2579  | -6.2870 | 0.1422  | na      | na       |

**TableS5** continued

| Populations     | GSTG1        |         |         |         |        |         |          | GSTH2        |         |         |         |        |         |          |
|-----------------|--------------|---------|---------|---------|--------|---------|----------|--------------|---------|---------|---------|--------|---------|----------|
|                 | Tajima's $D$ | $D^*$   | $F^*$   | $F_s$   | $H$    | MK test |          | Tajima's $D$ | $D^*$   | $F^*$   | $F_s$   | $H$    | MK test |          |
|                 |              |         |         |         |        | Fisher  | $G$ test |              |         |         |         |        | Fisher  | $G$ test |
| 1 Da Chay 90A   | -0.3026      | 0.9684  | 0.7035  | 0.6200  | 0.7313 | 0.5455  | 0.7540   | -0.4630      | -0.7341 | -0.7607 | -1.4830 | 0.0518 | na      | na       |
| 2 Da Chay 91B   | -0.8023      | 0.9796  | 0.5541  | -1.1950 | 0.4680 | 1.0000  | na       | 0.0799       | 0.1405  | 0.1426  | -3.4370 | 0.6814 | na      | na       |
| 3 Da Chay 89A   | -1.7130      | -2.3015 | -2.4579 | -1.0250 | 0.3137 | 1.0000  | 0.1030   | 1.4693       | 1.2590  | 1.5168  | 0.1800  | 0.7805 | na      | na       |
| 4 Cong Troi 102 | -0.7093      | -0.3748 | -0.4688 | 0.0200  | 0.8514 | 1.0000  | 0.0170   | 0.1491       | 0.0713  | 0.0931  | -2.3440 | 0.7020 | na      | na       |
| 5 Cong Troi 103 | 0.4212       | 1.0065  | 0.9732  | 1.1730  | 0.8311 | 1.0000  | 0.1030   | 1.5534       | 1.2998  | 1.5857  | -0.0860 | 1.0810 | na      | na       |
| 6 Bidoup        | -1.4407      | -1.2550 | -1.5017 | -2.1350 | 0.4376 | 1.0000  | 0.1030   | 0.6711       | 0.5473  | 0.6723  | -3.2180 | 0.9488 | na      | na       |
| Total           | -1.5137      | -0.9882 | -1.3912 | -6.3180 | 0.3946 | 1.0000  | 0.0080   | 1.1898       | 1.2501  | 1.4582  | -3.4510 | 0.9785 | na      | na       |

**TableS5** continued

| Populations     | IFG 1934     |         |         |         |         |         |          | IFG 8612     |         |         |         |         |         |          |
|-----------------|--------------|---------|---------|---------|---------|---------|----------|--------------|---------|---------|---------|---------|---------|----------|
|                 | Tajima's $D$ | $D^*$   | $F^*$   | $F_s$   | $H$     | MK test |          | Tajima's $D$ | $D^*$   | $F^*$   | $F_s$   | $H$     | MK test |          |
|                 |              |         |         |         |         | Fisher  | $G$ test |              |         |         |         |         | Fisher  | $G$ test |
| 1 Da Chay 90A   | 0.2724       | 0.8256  | 0.7742  | 0.2990  | -0.6822 | 0.14708 | na       | 0.1359       | 0.0889  | 0.1185  | -0.5400 | 0.7973  | na      | na       |
| 2 Da Chay 91B   | -0.6072      | 0.8373  | 0.5053  | -1.9790 | -1.9773 | 0.14708 | na       | -0.3204      | -0.8560 | -0.8140 | -1.0310 | 0.6068  | na      | na       |
| 3 Da Chay 89A   | 0.2204       | 0.8846  | 0.8103  | 0.1610  | -0.7743 | 0.14708 | na       | -0.3022      | -0.7011 | -0.6807 | -1.1430 | 0.4422  | na      | na       |
| 4 Cong Troi 102 | -0.9330      | -0.9502 | -0.9647 | -0.0030 | 0.5518  | 0.27273 | na       | -0.9330      | -0.9502 | -0.9647 | -0.0030 | -2.7588 | na      | na       |
| 5 Cong Troi 103 | -1.2057      | -0.7593 | -1.0171 | -2.2180 | -0.9029 | 0.36230 | 1.5450   | 0.1862       | -0.7593 | -0.5732 | 0.4210  | 0.5099  | na      | na       |
| 6 Bidoup        | 0.4354       | 0.8662  | 0.8605  | -0.9170 | -0.3823 | 0.14708 | na       | -0.8673      | 0.6766  | -0.6517 | -1.9150 | 0.6827  | na      | na       |
| Total           | -0.4747      | -0.2934 | -0.4147 | -2.0280 | -0.8105 | 0.36230 | 1.5450   | -1.1816      | -1.9712 | -2.0113 | -4.2090 | 0.4113  | na      | na       |

**TableS5** continued

| Populations     | <i>Rav 2</i>      |            |            |                      |          |                |               | <i>SOS27</i>      |            |            |                      |          |                |               |    |
|-----------------|-------------------|------------|------------|----------------------|----------|----------------|---------------|-------------------|------------|------------|----------------------|----------|----------------|---------------|----|
|                 | Tajima's <i>D</i> | <i>D</i> * | <i>F</i> * | <i>F<sub>s</sub></i> | <i>H</i> | <i>MK</i> test |               | Tajima's <i>D</i> | <i>D</i> * | <i>F</i> * | <i>F<sub>s</sub></i> | <i>H</i> | <i>MK</i> test |               |    |
|                 |                   |            |            |                      |          | <i>Fisher</i>  | <i>G</i> test |                   |            |            |                      |          | <i>Fisher</i>  | <i>G</i> test |    |
| 1 Da Chay 90A   | 0.3809            | 0.6121     | 0.6308     | 0.7840               | 0.6011   | 1.0000         | na            | na                | na         | na         | na                   | na       | na             | na            | na |
| 2 Da Chay 91B   | 0.4803            | 0.6227     | 0.6704     | 0.8470               | 0.6138   | 1.0000         | na            | -1.5147           | -2.1591    | -2.2809    | -2.0780              | 0.2574   | na             | na            | na |
| 3 Da Chay 89A   | 1.1662            | 0.6669     | 0.9102     | 1.2150               | 0.5509   | 1.0000         | na            | -1.5352           | -1.9890    | -2.1385    | -1.7960              | 0.3260   | na             | na            | na |
| 4 Cong Troi 102 | -0.9330           | -0.9502    | -0.9647    | -0.0030              | 0.5518   | na             | na            | 1.1241            | 1.3958     | 1.4062     | 0.6150               | 0.8514   | na             | na            | na |
| 5 Cong Troi 103 | 1.1513            | 0.6495     | 1.0100     | 1.4670               | 0.2245   | 1.0000         | na            | na                | na         | na         | na                   | na       | na             | na            | na |
| 6 Bidoup        | -0.6428           | -1.2550    | -1.2505    | -1.0060              | 0.5405   | 0.4667         | na            | na                | na         | na         | na                   | na       | na             | na            | na |
| Total           | -0.3515           | -0.6153    | -0.6244    | -0.5640              | 0.4521   | 0.4667         | na            | -1.8627           | -1.8098    | -2.1612    | -6.4980              | 0.1623   | na             | na            | na |

**TableS5** continued

| Populations     | <i>TPP 1</i>      |            |            |                      |          |                |               | <i>TPS 4</i>      |            |            |                      |          |                |               |
|-----------------|-------------------|------------|------------|----------------------|----------|----------------|---------------|-------------------|------------|------------|----------------------|----------|----------------|---------------|
|                 | Tajima's <i>D</i> | <i>D</i> * | <i>F</i> * | <i>F<sub>s</sub></i> | <i>H</i> | <i>MK</i> test |               | Tajima's <i>D</i> | <i>D</i> * | <i>F</i> * | <i>F<sub>s</sub></i> | <i>H</i> | <i>MK</i> test |               |
|                 |                   |            |            |                      |          | <i>Fisher</i>  | <i>G</i> test |                   |            |            |                      |          | <i>Fisher</i>  | <i>G</i> test |
| 1 Da Chay 90A   | -1.1556           | -1.6338    | -1.7271    | -1.0940              | 0.1803   | 0.4000         | na            | -1.2239           | -0.6891    | -0.9657    | -1.4990              | 0.3411   | 1.0000         | 0.1380        |
| 2 Da Chay 91B   | -1.1593           | -1.6058    | -1.7042    | -1.0280              | 0.1929   | 0.4000         | na            | -0.6322           | -0.1889    | -0.3614    | -0.9820              | 0.6348   | 1.0000         | 0.6800        |
| 3 Da Chay 89A   | na                | na         | na         | na                   | na       | na             | na            | -0.5290           | 0.6669     | 0.4045     | -0.0110              | 0.4285   | 1.0000         | na            |
| 4 Cong Troi 102 | na                | na         | na         | na                   | na       | na             | na            | -1.1320           | -1.1553    | -1.1951    | -0.8580              | 0.7341   | 1.0000         | 0.1380        |
| 5 Cong Troi 103 | na                | na         | na         | na                   | na       | na             | na            | -0.0861           | 0.6495     | 0.5203     | 0.3810               | 0.5239   | 1.0000         | na            |
| 6 Bidoup        | -1.1644           | -1.5396    | -1.6477    | -0.8790              | 0.2245   | 0.4000         | na            | -1.6439           | -1.5396    | -1.6477    | -0.8790              | 0.2245   | 1.0000         | na            |
| Total           | -1.2920           | -1.1017    | -1.3595    | -3.4760              | 0.0987   | 0.4000         | na            | -0.7913           | 0.8159     | 0.3589     | -1.4500              | 0.4252   | 1.0000         | 0.6800        |

\*P<0.05; *na*, not calculated due to low polymorphism.

**Table S6** Population differentiation ( $F_{ST}$ ) for each region and total sample of *P. krempfii* based on individual and combined nuclear loci.

| Regions         | No. of populations | Locus           |            |            |              |                 |               |              |               |               |              |            |
|-----------------|--------------------|-----------------|------------|------------|--------------|-----------------|---------------|--------------|---------------|---------------|--------------|------------|
|                 |                    | <i>IFG 8612</i> | <i>CFX</i> | <i>4CL</i> | <i>TPP 1</i> | <i>IFG 1934</i> | <i>SOS 27</i> | <i>Rav 2</i> | <i>GSTG 1</i> | <i>GSTH 2</i> | <i>TPS 4</i> | Multilocus |
| Group Da Chay   | 3                  | -0.016          | 0.074*     | <0.001     | -0.029       | -0.005          | 0.023*        | -0.016       | 0.051*        | 0.039         | 0.016        | 0.038*     |
| Group Cong Troi | 2                  | 0.149           | 0.071      | -0.043     | Monomorphic  | -0.027          | 0.471**       | 0.270*       | -0.076        | -0.001        | -0.029       | 0.078*     |
| Total range     | 6                  | 0.013           | 0.085**    | 0.018      | -0.019       | 0.002           | 0.204**       | 0.026        | 0.048*        | 0.043*        | 0.005        | 0.052**    |

\* $P < 0.05$ ; \*\* $P < 0.01$ .

**Table S7** Summary of nucleotide diversity and effective population size in 22 pine species based on nuclear genes. Species with limited range of distribution are in bold.

| Species                      | No. of loci | <i>L</i> | <i>N</i> | $\pi_t$ | $\pi_s$ | $\theta_w$ | $\theta_{ws}$ | $N_e \times 10^{4*}$ | Reference                                |
|------------------------------|-------------|----------|----------|---------|---------|------------|---------------|----------------------|------------------------------------------|
| <i>Pinus krempfii</i>        | 10          | 8950     | 57       | 0.0011  | 0.0015  | 0.0014     | 0.0020        | 1.43                 | This study                               |
| <i>P. tabuliformis</i>       | 7           | 3040     | 43       | 0.0085  | 0.0119  | 0.0107     | 0.0153        | 10.93                | (Ma <i>et al.</i> , 2006)                |
|                              | 8           | 5763     | 48       | 0.0070  | 0.0150  | 0.0092     | 0.0173        | 12.37                | (Gao <i>et al.</i> , 2012)               |
| <i>P. yunnanensis</i>        | 7           | 3040     | 29       | 0.0067  | 0.0095  | 0.0055     | 0.0077        | 5.50                 | (Ma <i>et al.</i> , 2006)                |
|                              | 8           | 5763     | 40       | 0.0046  | 0.0101  | 0.0060     | 0.0101        | 7.21                 | (Gao <i>et al.</i> , 2012)               |
| <i>P. densata</i>            | 7           | 3040     | 66       | 0.0086  | 0.0122  | 0.0101     | 0.0143        | 10.21                | (Ma <i>et al.</i> , 2006)                |
|                              | 8           | 5763     | 136      | 0.0065  | 0.0138  | 0.0098     | 0.0153        | 10.93                | (Gao <i>et al.</i> , 2012)               |
| <i>P. pinaster</i>           | 11          | 9367     | 208      | 0.0055  | 0.0085  | 0.0062     | na            | 6.07                 | (Eveno <i>et al.</i> , 2008)             |
|                              | 6           | 5588     | 122      | 0.0057  | na      | 0.0045     | na            | 3.20                 | (Grivet <i>et al.</i> , 2011)            |
|                              | 8           | 4746     | 14       | 0.0024  | na      | 0.0021     | na            | 1.52                 | (Pot <i>et al.</i> , 2005)               |
| <b><i>P. radiata</i></b>     | 8           | 4746     | 23       | 0.0019  | na      | 0.0019     | na            | 1.36                 | (Pot <i>et al.</i> , 2005)               |
| <i>P. taeda</i>              | 19          | 18027    | 32       | 0.0040  | 0.0064  | 0.0041     | 0.0066        | 4.70                 | (Brown <i>et al.</i> , 2004)             |
|                              | 28          | na       | 32       | na      | na      | 0.0049     | 0.0059        | 4.20                 | (Neale & Savolainen, 2004)               |
|                              | 16          | na       | 32       | na      | na      | 0.0046     | 0.0070        | 5.00                 | (Neale & Savolainen, 2004)               |
|                              | 18          | 10116    | 32       | 0.0051  | 0.0085  | 0.0053     | 0.0079        | 5.56                 | (Gonzalez-Martinez <i>et al.</i> , 2006) |
|                              | 41          | 22652    | 32       | 0.0049  | 0.0070  | 0.0060     | 0.0093        | 6.6                  | (Ersoz <i>et al.</i> , 2010)             |
| <i>P. halepensis</i>         | 10          | 5292     | 60       | 0.0018  | na      | 0.0029     | na            | 2.07                 | (Grivet <i>et al.</i> , 2009)            |
|                              | 6           | 4596     | 93       | 0.0031  | na      | 0.0026     | na            | 1.86                 | (Grivet <i>et al.</i> 2011)              |
| <i>P. sylvestris</i>         | 16          | 6274     | 40       | 0.0034† | 0.0070  | 0.0061‡    | 0.0050        | 3.57                 | (Pyhäjärvi <i>et al.</i> , 2007)         |
|                              | 17          | 9880     | 40       | 0.0041  | 0.0057  | na         | 0.0080        | 5.71                 | (Wachowiak <i>et al.</i> , 2011a)        |
|                              | 14          | 9635     | 40       | 0.0060  | 0.0077  | na         | 0.0089        | 6.35                 | (Wachowiak <i>et al.</i> , 2009)         |
|                              | 11          | 30629    | 119      | 0.0032  | 0.0055  | 0.0053     | 0.0062        | 4.43                 | (Kujala & Savolainen, 2012)              |
|                              | 12          | 6670     | 40       | 0.0078  | 0.0117  | na         | 0.0095        | 6.79                 | (Wachowiak <i>et al.</i> , 2011b)        |
|                              | 8           | 5417     | 28       | 0.0058  | 0.0076  | 0.0063     | 0.0055        | 3.94                 | (Ren <i>et al.</i> , 2012)               |
|                              | 8           | 21607    | 35       | na      | 0.0079  | na         | 0.010         | 7.14                 | (Pyhäjärvi <i>et al.</i> , 2011)         |
| <i>P. mugo</i>               | 17          | 9909     | 12       | 0.0049  | 0.0067  | na         | 0.0072        | 5.14                 | (Wachowiak <i>et al.</i> , 2011a)        |
|                              | 12          | 4851     | 169      | 0.0118  | 0.0185  | na         | 0.0169        | 12.07                | (Wachowiak <i>et al.</i> , 2013)         |
|                              | 310         | 119060   | 12       | 0.0077  | 0.0065  | 0.0076     | 0.0067        | 4.79                 | (Mosca <i>et al.</i> , 2012)             |
| <i>P. uncinata</i>           | 12          | 4851     | 93       | 0.0113  | 0.0178  | na         | 0.0134        | 9.57                 | (Wachowiak <i>et al.</i> , 2013)         |
| <b><i>P. cembra</i></b>      | 280         | 109369   | 12       | 0.0018  | 0.0024  | 0.0019     | 0.0024        | 1.71                 | (Mosca <i>et al.</i> , 2012)             |
| <i>P. chiapensis</i>         | 3           | 2800     | 7        | 0.0031  | na      | na         | na            | 2.21                 | (Syring <i>et al.</i> , 2007)            |
| <i>P. ayacahuite</i>         | 3           | 2800     | 8        | 0.0036  | na      | na         | na            | 2.57                 | (Syring <i>et al.</i> , 2007)            |
| <i>P. monticola</i>          | 3           | 2800     | 9        | 0.0092  | na      | na         | na            | 6.57                 | (Syring <i>et al.</i> , 2007)            |
| <i>P. strobus</i>            | 3           | 2800     | 10       | 0.0044  | na      | na         | na            | 3.14                 | (Syring <i>et al.</i> , 2007)            |
| <i>P. thunbergii</i>         | 15          | 5825     | 16       | 0.0061  | na      | 0.00697    | na            | 4.32                 | (Suharyanto & Shiraishi, 2011)           |
| <i>P. densiflora</i>         | 15          | 5825     | 16       | 0.0053  | na      | 0.00778    | na            | 3.76                 | (Suharyanto & Shiraishi, 2011)           |
|                              | 8           | 5458     | 28       | 0.0060  | 0.0078  | 0.00642    | 0.0064        | 4.57                 | (Ren <i>et al.</i> , 2012)               |
| <b><i>P. luchuensis</i></b>  | 15          | 5825     | 16       | 0.0050  | na      | 0.00607    | na            | 3.59                 | (Suharyanto & Shiraishi, 2011)           |
| <b><i>P. balfouriana</i></b> | 5           | 3089     | 40       | 0.0035  | na      | 0.00325    | na            | 2.32                 | (Eckert <i>et al.</i> , 2008)            |
| <b><i>P. canariensis</i></b> | 3           | 1327     | 384      | 0.0036  | na      | 0.00367    | na            | 2.56                 | (Lopez <i>et al.</i> , 2013)             |
| <i>P. contorta</i>           | 21          | 9906     | 95       | 0.0025  | 0.0035  | 0.00251    | 0.0034        | 2.43                 | (Eckert <i>et al.</i> , 2012)            |

$N$ , sample size;  $L$ , length in base pairs;  $\pi_t$ , nucleotide diversity based on total sites;  $\pi_s$ , nucleotide diversity based on silent sites;  $\theta_w$  nucleotide polymorphism based on total sites;  $\theta_w$  nucleotide polymorphism based on silent sites. \* $N_e$  (effective population size) was calculated based on  $\theta_w/4\mu$  with the same assumptions as generation time of 50 years and mutation rate per year of  $7 \times 10^{-10}$  estimated for the genus *Pinus* by Willyard *et al.* (2007). If  $\theta_w$  is not reported in original paper, then  $N_e$  is calculated sequentially based on  $\pi_s$ ,  $\theta_w$  or  $\pi_t$ .

†Calculated by Pavy *et al.* (2012) based on 14 of all 16 genes.

na, not reported in original paper.

## Reference

- Brown, G.R., Gill, G.P., Kuntz, R.J., Langley, C.H. & Neale, D.B. 2004. Nucleotide diversity and linkage disequilibrium in loblolly pine. *PNAS* **101**: 15255-15260.
- Eckert, A.J., Tarse, B.R. & Hall, B.D. 2008. A phylogeographical analysis of the range disjunction for foxtail pine (*Pinus balfouriana*, Pinaceae): the role of Pleistocene glaciation. *Mol. Ecol.* **17**: 1983-1997.
- Eckert, A.J., Shahi, H., Datwyler, S.L. & Neale, D.B. 2012. Spatially variable natural selection and the divergence between parapatric subspecies of lodgepole pine (*Pinus contorta*, Pinaceae). *Am. J. Bot.* **99**: 1323-1334.
- Ersoz, E.S., Wright, M.H., Gonzalez-Martinez, S.C., Langley, C.H. & Neale, D.B. 2010. Evolution of disease response genes in loblolly pine: insights from candidate genes. *PloS One* **5**: e14234.
- Eveno, E., Collada, C., Guevara, M.A., Leger, V., Soto, A., Diaz, L., Leger, P., Gonzalez-Martinez, S.C., Cervera, M.T., Plomion, C. & Garnier-Gere, P.H. 2008. Contrasting patterns of selection at *Pinus pinaster* Ait. drought stress candidate genes as revealed by genetic differentiation analyses. *Mol. Biol. Evol.* **25**: 417-437.
- Gao, J., Wang, B., Mao, J.F., Ingvarsson, P., Zeng, Q.Y. & Wang, X.R. 2012. Demography and speciation history of the homoploid hybrid pine *Pinus densata* on the Tibetan Plateau. *Mol. Ecol.* **21**: 4811-4827.
- Gonzalez-Martinez, S.C., Ersoz, E., Brown, G.R., Wheeler, N.C. & Neale, D.B. 2006. DNA sequence variation and selection of tag single-nucleotide polymorphisms at candidate genes for drought-stress response in *Pinus taeda* L. *Genetics* **172**: 1915-1926.
- Grivet, D., Sebastiani, F., Gonzalez-Martinez, S.C. & Vendramin, G.G. 2009. Patterns of polymorphism resulting from long-range colonization in the Mediterranean conifer Aleppo pine. *New Phytol.* **184**: 1016-1028.
- Grivet, D., Sebastiani, F., Alia, R., Bataillon, T., Torre, S., Zabal-Aguirre, M., Vendramin, G.G. & Gonzalez-Martinez, S.C. 2011. Molecular footprints of local adaptation in two Mediterranean conifers. *Mol. Biol. Evol.* **28**: 101-116.
- Kujala, S.T. & Savolainen, O. 2012. Sequence variation patterns along a latitudinal cline in Scots pine (*Pinus sylvestris*): signs of clinal adaptation? *Tree Genet. Genomes* **8**: 1451-1467.
- Lopez, R., de Heredia, U.L., Collada, C., Cano, F.J., Emerson, B.C., Cochard, H. & Gil, L. 2013. Vulnerability to cavitation, hydraulic efficiency, growth and survival in an insular pine (*Pinus canariensis*). *Ann. Bot.* **111**: 1167-1179.

- Ma, X.F., Szmidt, A.E. & Wang, X.R. 2006. Genetic structure and evolutionary history of a diploid hybrid pine *Pinus densata* inferred from the nucleotide variation at seven gene loci. *Mol. Biol. Evol.* **23**: 807-816.
- Mosca, E., Eckert, A.J., Liechty, J.D., Wegrzyn, J.L., La Porta, N., Vendramin, G.G. & Neale, D.B. 2012. Contrasting patterns of nucleotide diversity for four conifers of Alpine European forests. *Evol. Appl.* **5**: 762-775.
- Neale, D.B. & Savolainen, O. 2004. Association genetics of complex traits in conifers. *Trends Plant Sci.* **9**: 325-330.
- Pavy, N., Namroud, M.C., Gagnon, F., Isabel, N. & Bousquet, J. 2012. The heterogeneous levels of linkage disequilibrium in white spruce genes and comparative analysis with other conifers. *Heredity* **108**: 273-284.
- Pot, D., McMillan, L., Echt, C., Le Provost, G., Garnier-Gere, P., Cato, S. & Plomion, C. 2005. Nucleotide variation in genes involved in wood formation in two pine species. *New Phytol.* **167**: 101-112.
- Pyhäjärvi, T., Garcia-Gil, M.R., Knürr, T., Mikkonen, M., Wachowiak, W. & Savolainen, O. 2007. Demographic history has influenced nucleotide diversity in European *Pinus sylvestris* populations. *Genetics* **177**: 1713-1724.
- Pyhäjärvi, T., Kujala, S.T. & Savolainen, O. 2011. Revisiting protein heterozygosity in plants-nucleotide diversity in allozyme coding genes of conifer *Pinus sylvestris*. *Tree Genet. Genomes* **7**: 385-397.
- Ren, G.P., Abbott, R.J., Zhou, Y.F., Zhang, L.R., Peng, Y.L. & Liu, J.Q. 2012. Genetic divergence, range expansion and possible homoploid hybrid speciation among pine species in Northeast China. *Heredity* **108**: 552-562.
- Suharyanto & Shiraishi, S. 2011. Nucleotide diversities and genetic relationship in the three Japanese pine species; *Pinus thunbergii*, *Pinus densiflora*, and *Pinus luchuensis*. *Diversity* **3**: 121-135.
- Syring, J., Del Castillo, R.F., Cronn, R. & Liston, A. 2007. Multiple nuclear loci reveal the distinctiveness of the threatened, neotropical *Pinus chiapensis*. *Syst. Bot.* **32**: 703-717.
- Wachowiak, W., Balk, P.A. & Savolainen, O. 2009. Search for nucleotide diversity patterns of local adaptation in dehydrins and other cold-related candidate genes in Scots pine (*Pinus sylvestris* L.). *Tree Genet. Genomes* **5**: 117-132.
- Wachowiak, W., Palme, A.E. & Savolainen, O. 2011a. Speciation history of three closely related pines *Pinus mugo* (T.), *P. uliginosa* (N.) and *P. sylvestris* (L.). *Mol. Ecol.* **20**: 1729-1743.
- Wachowiak, W., Salmela, M.J., Ennos, R.A., Iason, G. & Cavers, S. 2011b. High genetic diversity at the extreme range edge: nucleotide variation at nuclear loci in Scots pine (*Pinus sylvestris* L.) in Scotland. *Heredity* **106**: 775-787.
- Wachowiak, W., Boratynska, K. & Cavers, S. 2013. Geographical patterns of nucleotide diversity and population differentiation in three closely related European pine species in the *Pinus mugo* complex. *Bot. J. Linn. Soc.* **172**: 225-238.
- Willyard, A., Syring, J., Gernandt, D.S., Liston, A. & Cronn, R. 2007. Fossil calibration of molecular divergence infers a moderate mutation rate and recent radiations for *Pinus*. *Mol. Biol. Evol.* **24**: 90-101.

Fig. S1

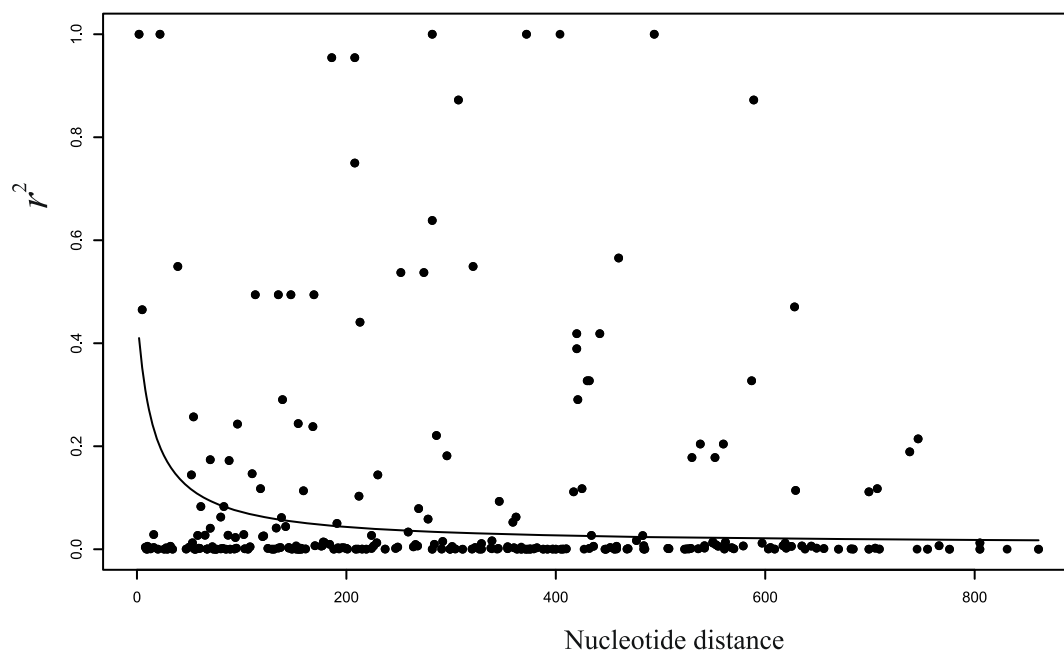

Fig. S2

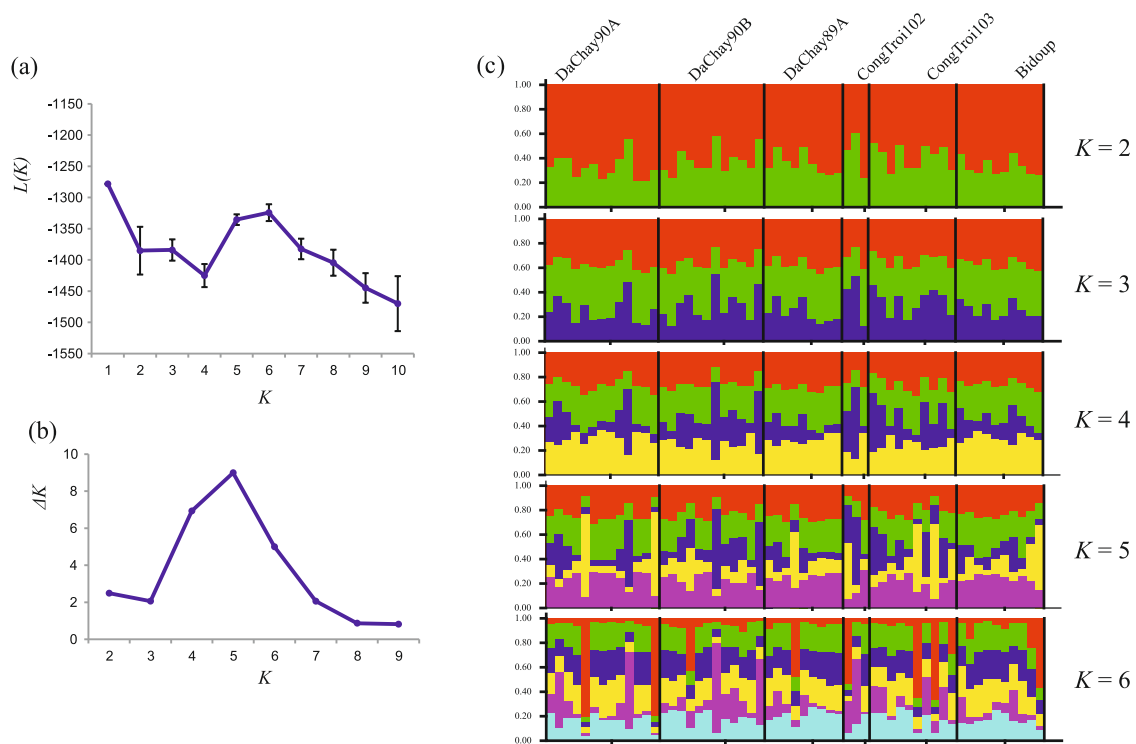

Fig. S3

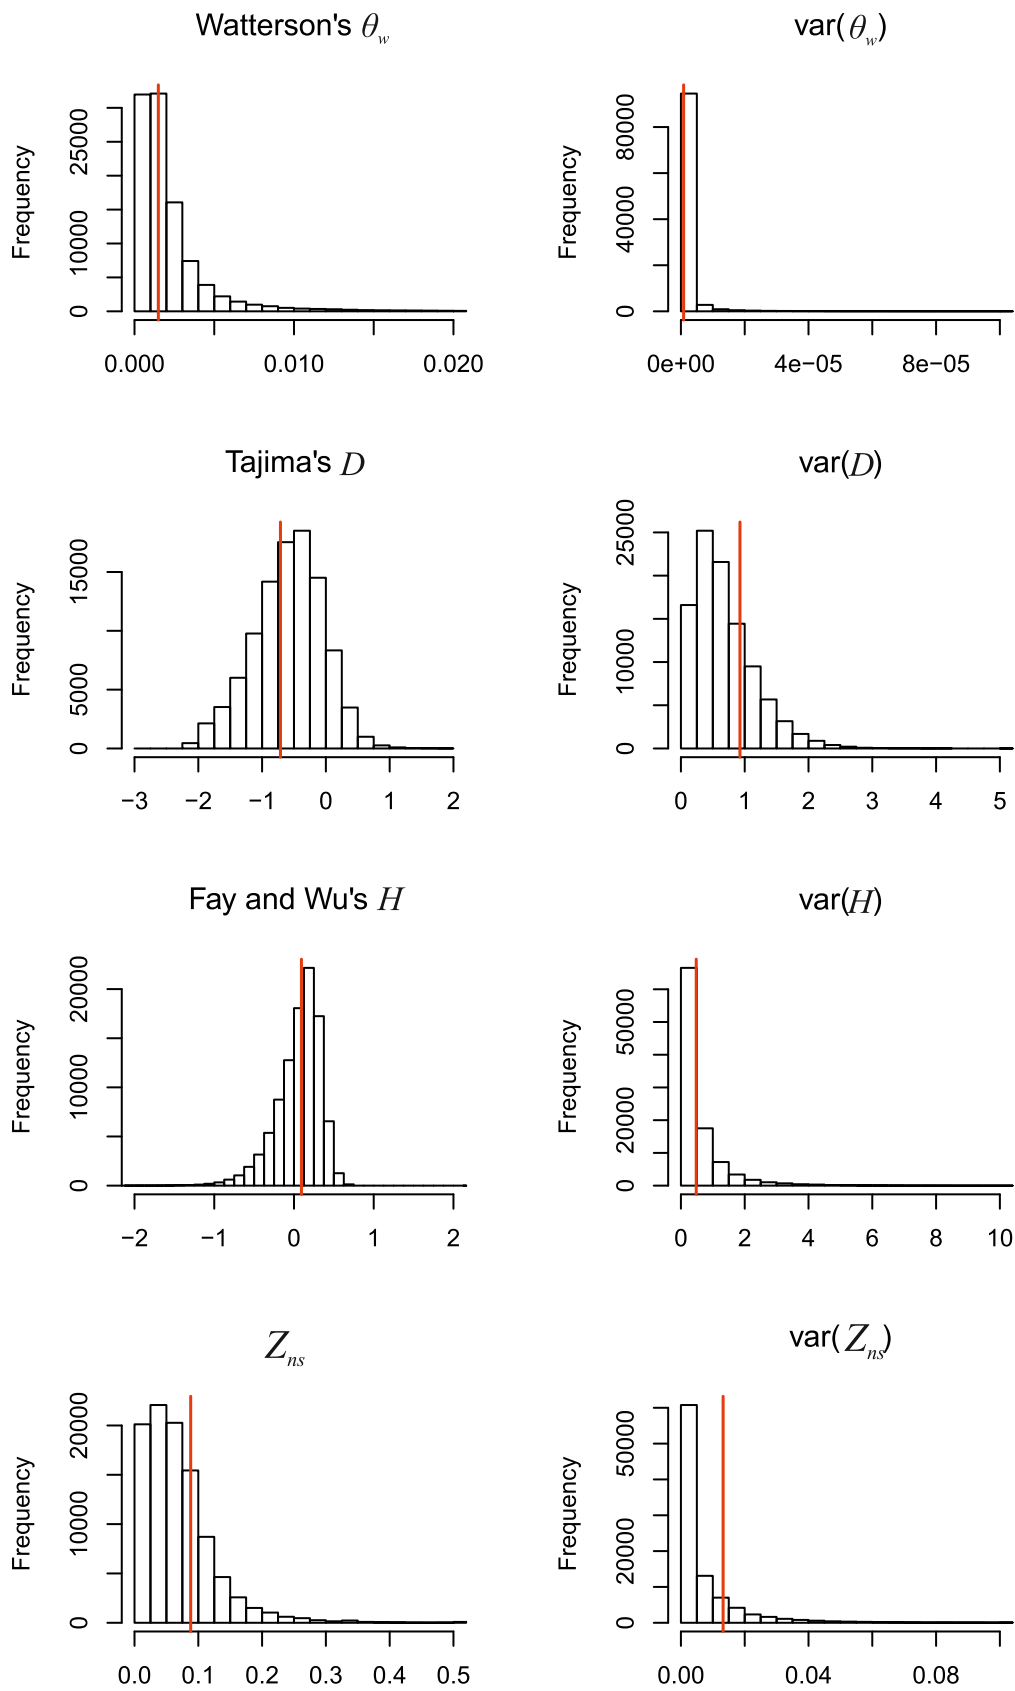

Supplement: ece30004-2228-sd1.pdf [file ece30004-2228-sd1.pdf]
